# Supplementary material for: Quantitative Electroencephalographic Markers of Delirium in the Pediatric Intensive Care Unit: Insights From a Heterogenous Convenience Sample
Source: Atypon-hosted journal article supplement (doi:10.1176/appi.neuropsych.20070184), 2021-03-24

**Supplementary Data:****Table S1.** Patient demographics and clinical characteristics

| <b>Cohort</b>                        | <b><i>Prospective (Phase 2)</i></b><br><b><i>(n= 15)</i></b> | <b><i>Retrospective</i></b><br><b><i>(Phase 1)</i></b><br><b><i>(n= 8)</i></b> | <b><i>Overall</i></b><br><b><i>(n=23)</i></b> |
|--------------------------------------|--------------------------------------------------------------|--------------------------------------------------------------------------------|-----------------------------------------------|
| Age (years)                          |                                                              |                                                                                |                                               |
| 0-2                                  | 6                                                            | 4                                                                              | 10                                            |
| >2-5                                 | 2                                                            | 2                                                                              | 4                                             |
| >5-13                                | 4                                                            | 2                                                                              | 6                                             |
| >13                                  | 3                                                            | 0                                                                              | 3                                             |
| Sex                                  |                                                              |                                                                                |                                               |
| male                                 | 10                                                           | 4                                                                              | 14                                            |
| female                               | 5                                                            | 4                                                                              | 9                                             |
| Admitting Diagnosis                  |                                                              |                                                                                |                                               |
| Neurological disorder                | 12                                                           | 5                                                                              | 17                                            |
| Seizure disorders                    | 10                                                           | 3                                                                              | 13                                            |
| Hydrocephalus                        | 0                                                            | 1                                                                              | 1                                             |
| Brain tumors                         | 1                                                            | 0                                                                              | 1                                             |
| Altered mental<br>status/Motor tics  | 1                                                            | 1                                                                              | 2                                             |
| Respiratory<br>insufficiency/failure | 2                                                            | 2                                                                              | 2                                             |
| Cardiac condition                    | 1                                                            | 1                                                                              | 4                                             |

|                                                                |                  |                 |                  |
|----------------------------------------------------------------|------------------|-----------------|------------------|
| Delirium diagnosis (ever;<br>total $n=17$ )                    | 9                | 8               | 17               |
| Number of delirium<br>assessments per subject<br>(median; IQR) | 3 (1.5-5)        | 3 (2.75-3.25)   | 3 (2-4)          |
| Delirium occurrences<br>( $n=72$ )                             | 29<br>( $n=54$ ) | 9<br>( $n=18$ ) | 38<br>( $n=72$ ) |

**Supplementary Table S2.** Comparison of maximal delta-to-alpha ratios in 12-hour episodes with and without delirium in each cohort and overall sample. \*Controlled for within-subject correlation.

|                       | Delta-to-Alpha ratio | <i>No delirium</i> |                    | <b>Delirium</b> |                    | <i>p value</i> | <b>Odds Ratios*</b> | <b>Confidence Interval</b> | <i>p value</i> |
|-----------------------|----------------------|--------------------|--------------------|-----------------|--------------------|----------------|---------------------|----------------------------|----------------|
|                       |                      | Mean               | Standard Deviation | Mean            | Standard Deviation |                |                     |                            |                |
|                       |                      | ( <i>n=34</i> )    |                    | ( <i>n=38</i> ) |                    |                |                     |                            |                |
| <b>Full Cohort</b>    | <i>Frontal</i>       | 1.46               | 0.42               | 1.71            | 0.40               | 0.013          | 4.85                | 0.92-25.56                 | 0.063          |
|                       | <i>Parietal</i>      | 1.48               | 0.42               | 1.74            | 0.40               | 0.010          | 5.47                | 1.01-29.67                 | 0.049          |
|                       | <i>Occipital</i>     | 1.48               | 0.42               | 1.75            | 0.40               | 0.008          | 5.94                | 1.07-33.04                 | 0.042          |
|                       | <i>Temporal</i>      | 1.48               | 0.41               | 1.73            | 0.39               | 0.010          | 5.88                | 1.02-33.94                 | 0.048          |
|                       | <i>Global</i>        | 1.50               | 0.42               | 1.74            | 0.42               | 0.017          | 3.94                | 0.81-19.07                 | 0.089          |
|                       |                      | ( <i>n=8</i> )     |                    | ( <i>n=10</i> ) |                    |                |                     |                            |                |
| <b>Phase 1 Cohort</b> | <i>Frontal</i>       | 1.67               | 0.35               | 1.90            | 0.53               | 0.292          | 3.94                | 0.19-82.75                 | 0.377          |
|                       | <i>Parietal</i>      | 1.69               | 0.34               | 1.93            | 0.52               | 0.258          | 4.49                | 0.20-102.53                | 0.346          |
|                       | <i>Occipital</i>     | 1.70               | 0.35               | 1.94            | 0.50               | 0.242          | 5.16                | 0.18-150.74                | 0.341          |
|                       | <i>Temporal</i>      | 1.68               | 0.33               | 1.90            | 0.50               | 0.282          | 4.51                | 0.17-122.99                | 0.371          |

|                           |                  |        |      |        |      |       |      |            |       |
|---------------------------|------------------|--------|------|--------|------|-------|------|------------|-------|
|                           | <b>Global</b>    | 1.78   | 0.37 | 1.93   | 0.51 | 0.492 | 2.05 | 0.12-34.43 | 0.617 |
|                           |                  | (n=26) |      | (n=28) |      |       |      |            |       |
| <b>Phase 2<br/>Cohort</b> | <b>Frontal</b>   | 1.39   | 0.43 | 1.64   | 0.32 | 0.023 | 5.56 | 0.69-44.69 | 0.107 |
|                           | <b>Parietal</b>  | 1.42   | 0.42 | 1.67   | 0.33 | 0.02  | 6.32 | 0.78-50.86 | 0.083 |
|                           | <b>Occipital</b> | 1.42   | 0.42 | 1.68   | 0.34 | 0.017 | 6.85 | 0.84-55.74 | 0.072 |
|                           | <b>Temporal</b>  | 1.42   | 0.42 | 1.67   | 0.33 | 0.018 | 6.91 | 0.82-58.23 | 0.076 |
|                           | <b>Global</b>    | 1.42   | 0.40 | 1.68   | 0.38 | 0.017 | 5.52 | 0.78-39.04 | 0.087 |

**Supplementary Figure S1.** Correlations between maximal DAR and CAP-D scores in each cohort and overall sample.

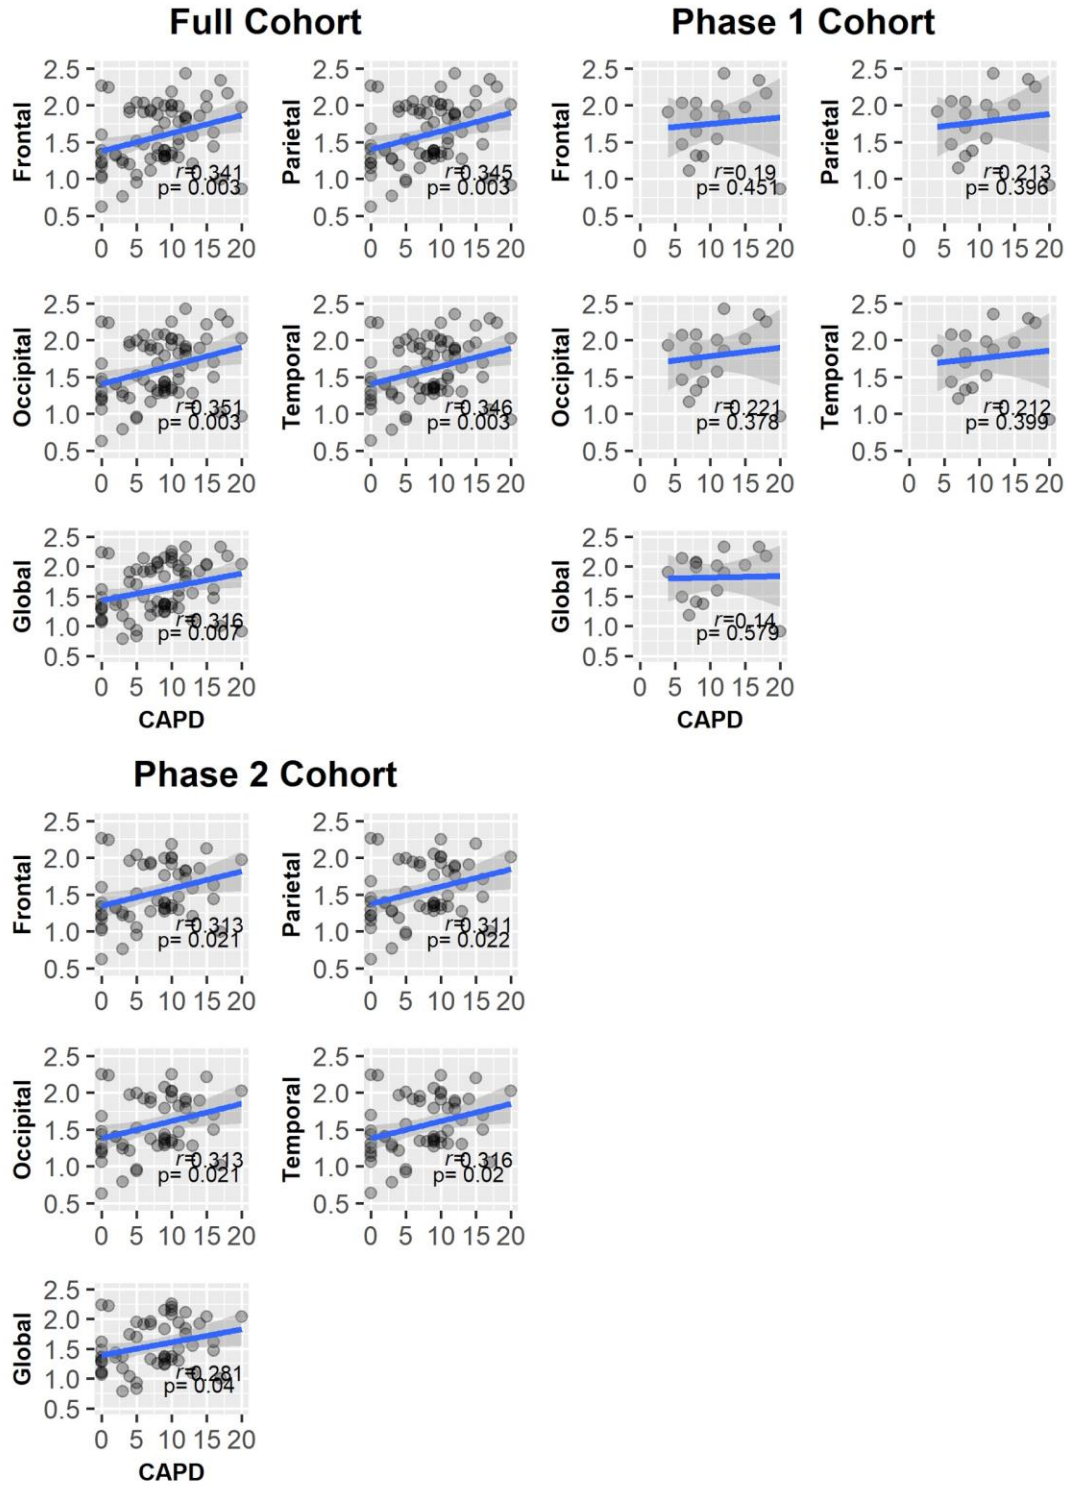

Supplement: appi.neuropsych.20070184.ds001.pdf [file appi.neuropsych.20070184.ds001.pdf]
